# Supplementary material for: Hydration effect on interaction mode between glutamic acid and Ca2+ and its biochemical implication: a theoretical exploration
Source: Royal Society of Chemistry journal article supplement (doi:10.1039/b518408h), 2006-01-01
Supplement: b518408h.pdf [file b518408h.pdf]

## Hydration Effect on Interaction Mode Between Glutamic Acid and $\text{Ca}^{2+}$ and Its Biochemical Implication: A Theoretical Exploration

Feng Xiang <sup>a</sup>, Ping Li <sup>a</sup>, Shihai Yan <sup>a</sup>, Lixiang Sun <sup>a</sup>, Robert I. Cukier <sup>b</sup>, Yuxiang Bu <sup>\*a,b</sup>

<sup>a</sup> Institute of Theoretical Chemistry, Shandong University, Jinan 250100, P. R. China

<sup>b</sup> Department of Chemistry, Michigan State University, East Lansing, MI 48823, USA

### Supporting Information

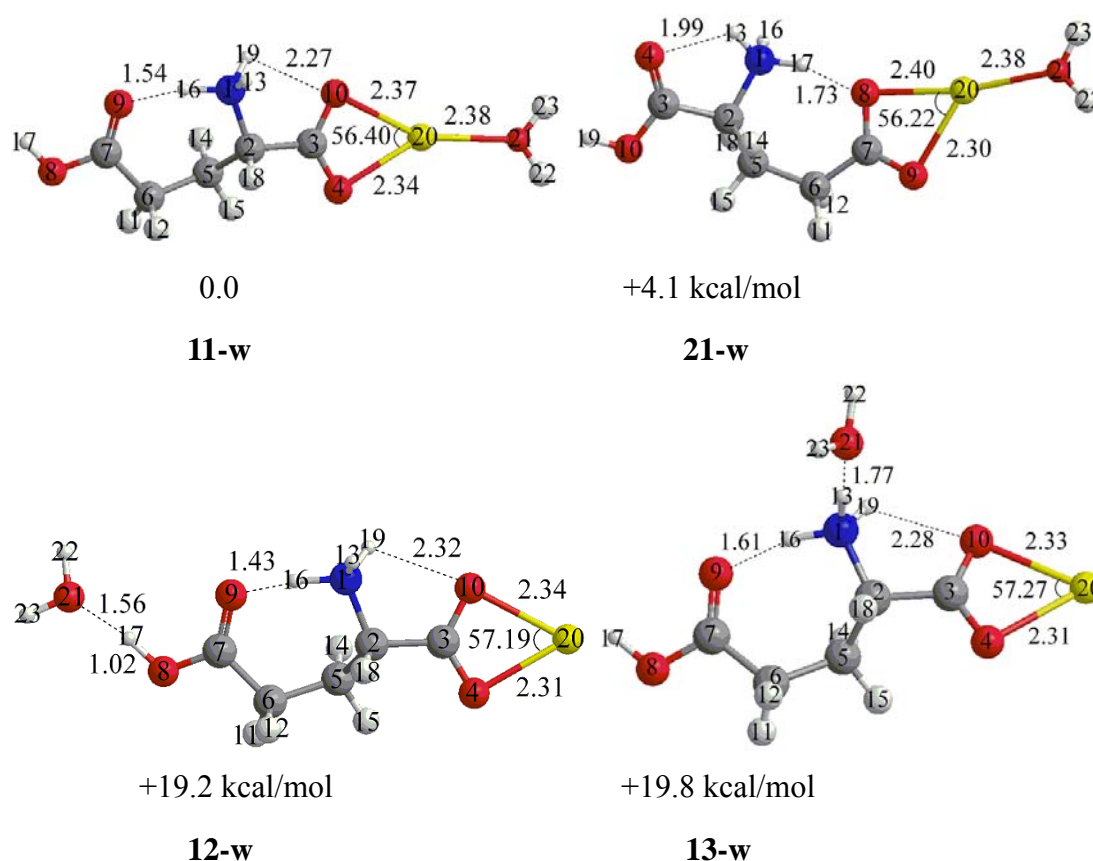

\* The corresponding author: Yuxiang Bu, byx@sdu.edu.cn

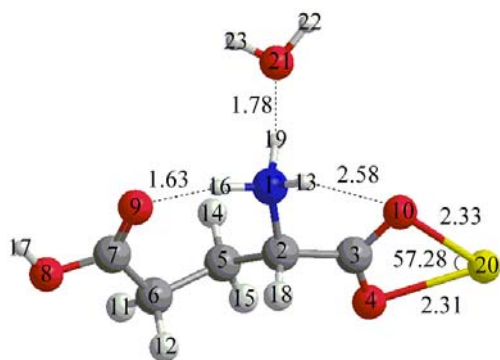

+21.1 kcal/mol

**14-w**

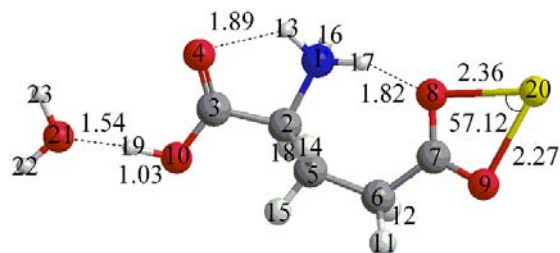

+22.1 kcal/mol

**22-w**

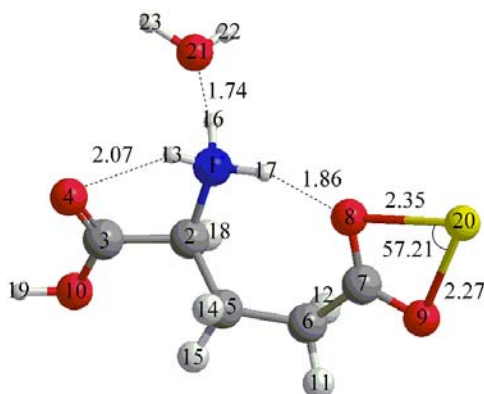

+22.6 kcal/mol

**23-w**

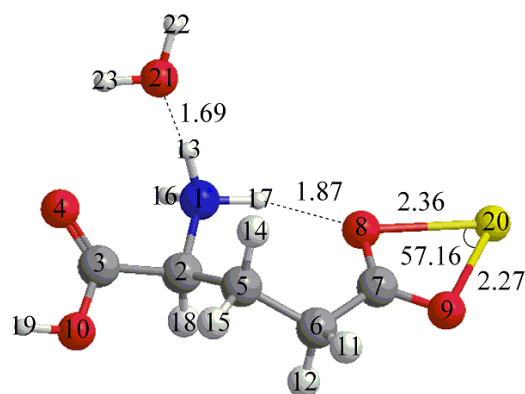

+24.1 kcal/mol

**24-w**

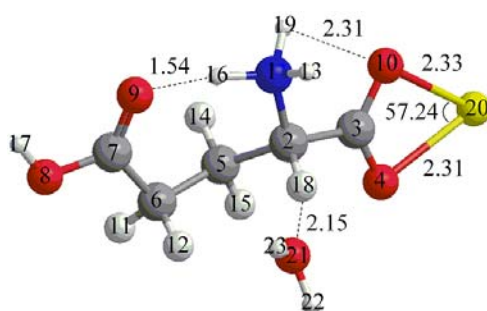

+24.8 kcal/mol

**15-w**

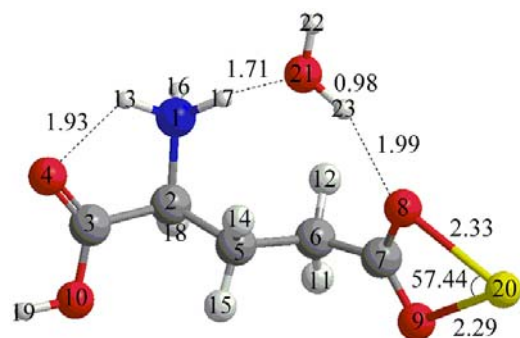

+25.1 kcal/mol

**25-w**

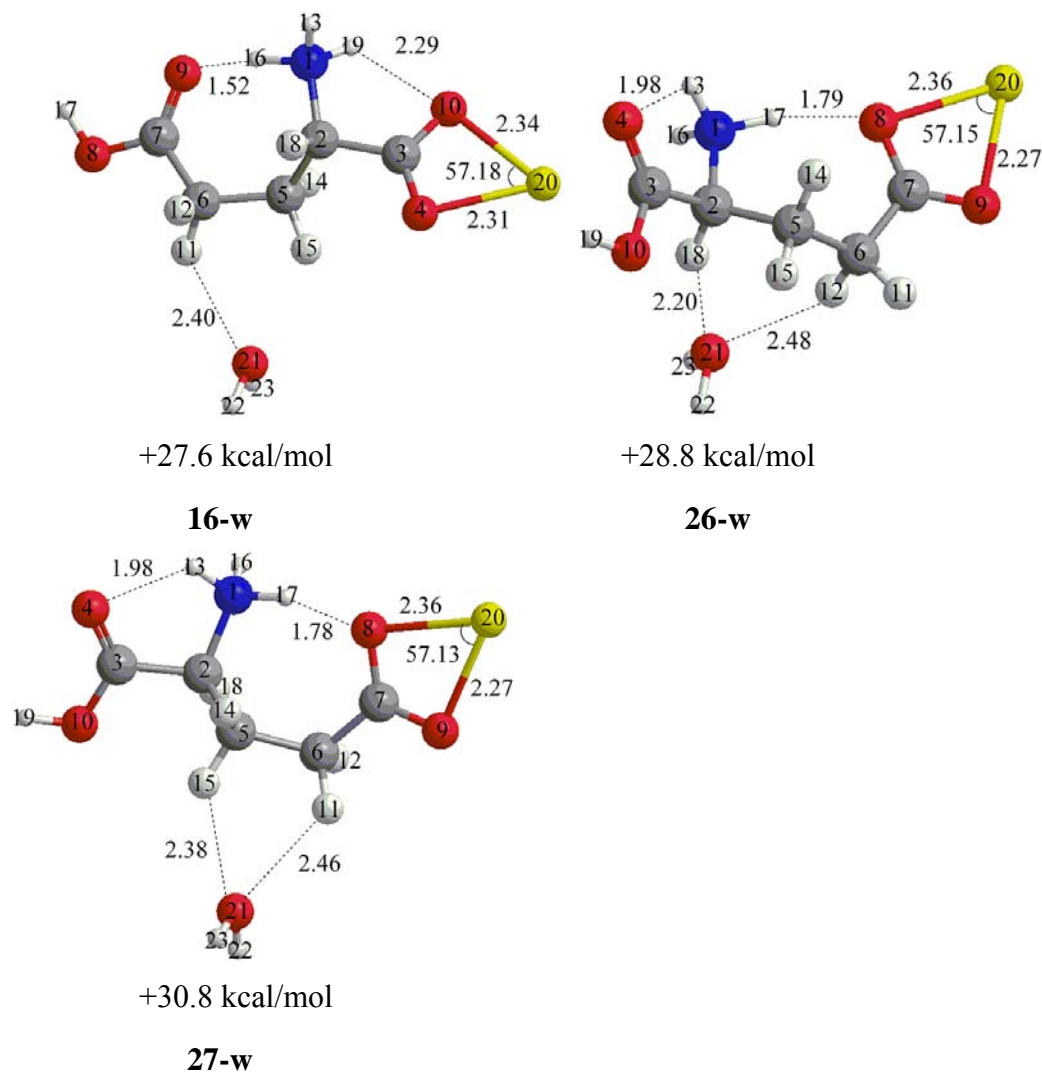

**Figure S1.** All of the B3LYP/6-31G (d, p)-optimized mono-hydrated complexes of the **1**- and **2**-series corresponding to the local minima points on the PES. Distances in the figure are given in angstroms, and the angles are given in degree. Here, the relative energies are listed below the different isomers with ZPVE corrections. The yellow ball is referred to  $\text{Ca}^{2+}$ , the red denotes O atom, the blue denotes N, the gray denotes C atom, and the white-gray denotes H atom, respectively.

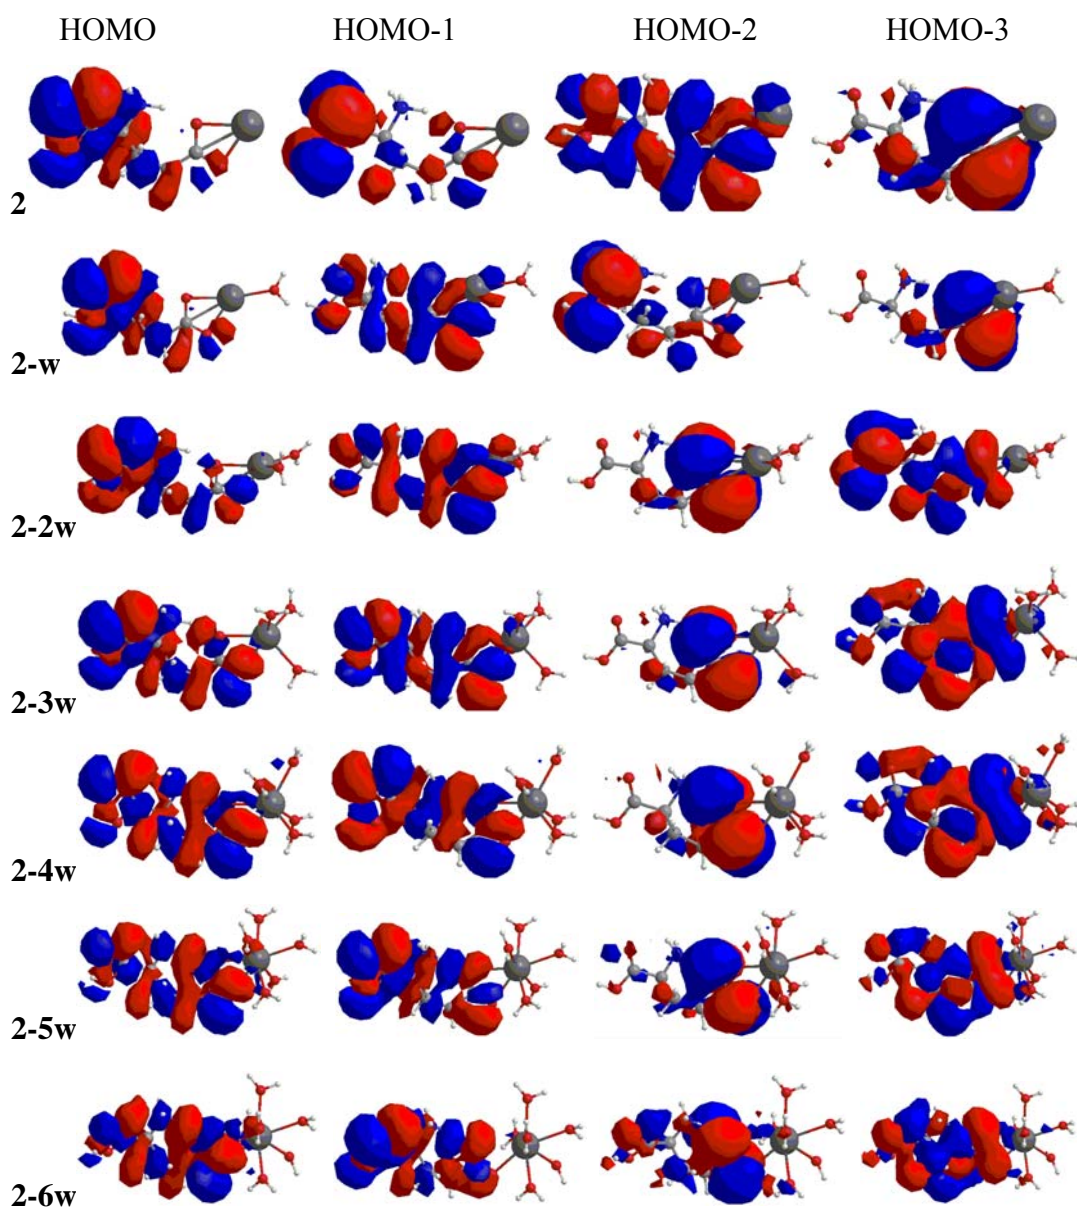

**Figure S2.** Diagrams of high energy level orbitals for the glutamic acid- $\text{Ca}^{2+}$ - $(\text{H}_2\text{O})_n$  ( $n=0-6$ ) complex of the 2-series. Isocontour value 0.01 is used. The order is HOMO, HOMO-1, HOMO-2 and HOMO-3 from left to right.

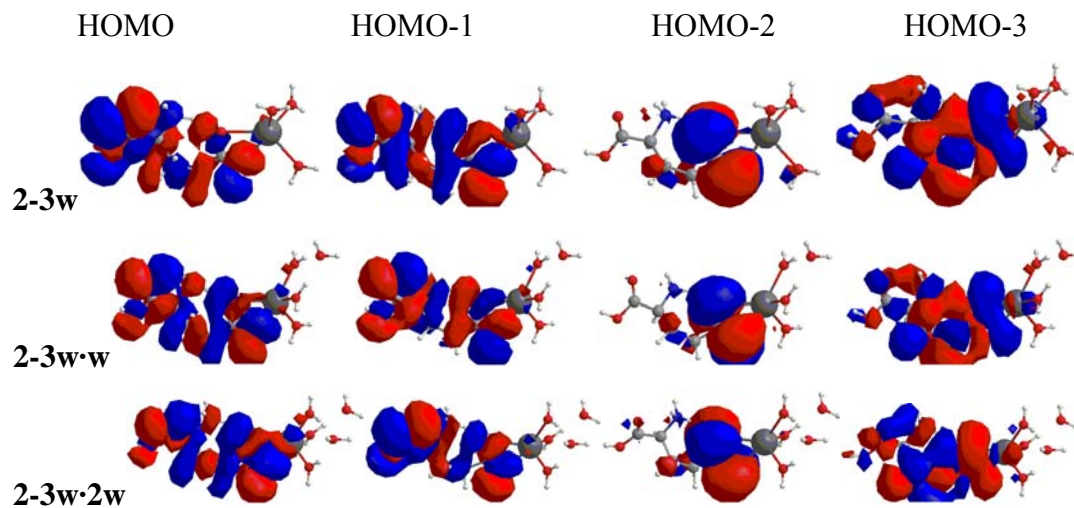

**Figure S3.** Diagrams of high energy level orbitals for the (3, 0), (3, 1) and (3, 2) modes of the 2-series. Isocontour value 0.01 is used. The order is HOMO, HOMO-1, HOMO-2 and HOMO-3 from left to right.

**TABLE S1.** The selected geometrical parameters of (n, 0), (n, 1), and (n, 2) Modes. The bond lengths (R), bond angles (A) are in angstroms and degrees, respectively. Atomic number used here is displayed in Figure 1.

**1-series:**

|                |          |                                      |                                          |            |
|----------------|----------|--------------------------------------|------------------------------------------|------------|
| Complex        | R (Ca-O) | R (N <sub>1</sub> -H <sub>16</sub> ) | R (O <sub>9</sub> ·····H <sub>16</sub> ) | A (O-Ca-O) |
| <b>1-2w</b>    | 2.393    | 1.08                                 | 1.56                                     | 55.80      |
| <b>1-2w·2w</b> | 2.378    | 1.07                                 | 1.58                                     | 55.33      |
| Complex        | R (Ca-O) | R (N <sub>1</sub> -H <sub>16</sub> ) | R (O <sub>9</sub> ·····H <sub>16</sub> ) | A (O-Ca-O) |
| <b>1-3w</b>    | 2.418    | 1.07                                 | 1.58                                     | 54.87      |
| <b>1-3w·w</b>  | 2.412    | 1.07                                 | 1.59                                     | 54.76      |
| <b>1-3w·2w</b> | 2.410    | 1.07                                 | 1.60                                     | 54.57      |
| Complex        | R (Ca-O) | R (N <sub>1</sub> -H <sub>16</sub> ) | R (O <sub>9</sub> ·····H <sub>16</sub> ) | A (O-Ca-O) |
| <b>1-4w</b>    | 2.447    | 1.07                                 | 1.59                                     | 54.30      |
| <b>1-4w·w</b>  | 2.443    | 1.07                                 | 1.60                                     | 53.85      |

**2-series:**

|                |          |                                      |                                          |            |
|----------------|----------|--------------------------------------|------------------------------------------|------------|
| Complex        | R (Ca-O) | R (N <sub>1</sub> -H <sub>17</sub> ) | R (O <sub>8</sub> ·····H <sub>17</sub> ) | A (O-Ca-O) |
| <b>2-2w</b>    | 2.390    | 1.06                                 | 1.68                                     | 55.56      |
| <b>2-2w·2w</b> | 2.373    | 1.06                                 | 1.63                                     | 55.05      |
| Complex        | R (Ca-O) | R (N <sub>1</sub> -H <sub>17</sub> ) | R (O <sub>8</sub> ·····H <sub>17</sub> ) | A (O-Ca-O) |
| <b>2-3w</b>    | 2.416    | 1.06                                 | 1.64                                     | 54.38      |
| <b>2-3w·w</b>  | 2.410    | 1.07                                 | 1.61                                     | 54.37      |
| <b>2-3w·2w</b> | 2.406    | 1.07                                 | 1.58                                     | 54.18      |
| Complex        | R (Ca-O) | R (N <sub>1</sub> -H <sub>17</sub> ) | R (O <sub>8</sub> ·····H <sub>17</sub> ) | A (O-Ca-O) |
| <b>2-4w</b>    | 2.445    | 1.07                                 | 1.60                                     | 53.76      |
| <b>2-4w·w</b>  | 2.445    | 1.08                                 | 1.57                                     | 53.11      |
| <b>2-4w·2w</b> | 2.445    | 1.09                                 | 1.53                                     | 53.22      |
| Complex        | R (Ca-O) | R (N <sub>1</sub> -H <sub>17</sub> ) | R (O <sub>8</sub> ·····H <sub>17</sub> ) | A (O-Ca-O) |
| <b>2-5w</b>    | 2.486    | 1.08                                 | 1.57                                     | 51.82      |
| <b>2-5w·w</b>  | 2.493    | 1.09                                 | 1.54                                     | 51.26      |

**TABLE S2.** Energy differences  $\Delta E$  (kcal/mol) among (5,0) (4,1) and (3,2) modes of the **1-** and **2-**series at the different levels plus ZPVE corrections.

| hydrates       | $\Delta E$ (kcal/mol) |                       |                    |                     |
|----------------|-----------------------|-----------------------|--------------------|---------------------|
|                | B3LYP/6-311++G(2d,p)  | B3LYP/6-311+G(3df,2p) | MP2/6-311++G(2d,p) | MP2/6-311+G(3df,2p) |
| <b>1-5w</b>    | 0.0                   | 0.0                   | 0.0                | 0.0                 |
| <b>1-4w•w</b>  | +0.2                  | +0.4                  | +3.0               | +2.8                |
| <b>1-3w•2w</b> | +3.4                  | +4.0                  | +9.5               | +9.0                |
| <b>2-5w</b>    | +1.1                  | +0.9                  | 0.0                | 0.0                 |
| <b>2-4w•w</b>  | 0.0                   | 0.0                   | +1.7               | +1.4                |
| <b>2-3w•2w</b> | +3.8                  | +3.9                  | +8.5               | +8.0                |
